# Supplementary material
Source: Springer Nature journal article supplement (https://www.springermedizin.de/resource/supplementary/13075_2009_3012_MOESM1_ESM.pdf/9693334)

TNF $\alpha$  level (pg/ml),  
pain intensity  
and depressive scores

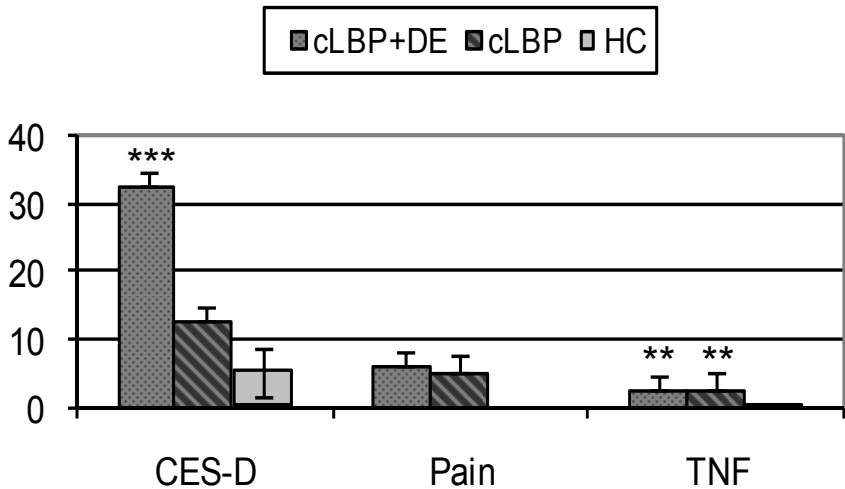

Supplement: MOESM1 [file 9693334]
